Submitted for publication in

PLoS NTD

Correspondence and proofs to:

Isik Unlu  
Center for Vector Biology,  
Rutgers University,  
New Brunswick, NJ 08901  
E-mail: [isik.unlu@miamidade.gov](mailto:isik.unlu@miamidade.gov)

**Do tigers hunt during the day? Diel Activity of the Asian tiger mosquito, *Aedes albopictus* (Diptera: Culicidae), in Urban and Suburban Habitats of North America**

Isik Unlu<sup>1</sup>, Ary Faraji<sup>1,2</sup>, Nicholas Indelicato<sup>3</sup>, James R. McNelly<sup>4,5</sup>

<sup>1</sup>Center for Vector Biology, Rutgers University, New Brunswick, NJ 08901

<sup>2</sup>Salt Lake City Mosquito Abatement District, Salt Lake City, UT 84116

<sup>3</sup>Mercer County Mosquito Control, West Trenton, NJ 08628

<sup>4</sup>Department of Entomology, Box 7647, North Carolina State University, Raleigh, NC 27695-7613, U.S.A.

<sup>5</sup>99 Red Gate Rd, George Town, Cayman Island

\*Corresponding author: Corresponding author: Isik Unlu. Mosquito Control and Habitat Management Division, 8901 NW 58<sup>th</sup> Street, Miami, Florida, 33178 Phone: 305-592-1187, Email: [isikunlu@miamidade.gov](mailto:isikunlu@miamidade.gov)

1 **ABSTRACT**

2 *Aedes (Stegomyia) albopictus* (Skuse) impacts human outdoor activity because of its aggressive  
3 biting behavior, and as a major vector of mosquito-borne diseases, it is also of public health  
4 importance. Although most mosquito species exhibit crepuscular activity by primarily host  
5 seeking at dawn and dusk, *Ae. albopictus* has been traditionally characterized as a diurnal or day-  
6 biting mosquito. With the global expansion and increased involvement of *Ae. albopictus* in  
7 mosquito-borne diseases, it is imperative to elucidate the diel activity of this species, particularly  
8 in newly invaded areas. Human sweep netting and carbon dioxide-baited rotator traps were used  
9 to evaluate the diel activity of *Ae. albopictus* in two study sites. Both trapping methods were  
10 used in New Jersey's Mercer County, USA (temperate urban), while only human sweep netting  
11 was used in Florida's Volusia County, USA (subtropical suburban). Human sweep netting was  
12 performed to determine adult mosquito activity at sunrise, solar noon, sunset, and lunar  
13 midnight. Because New Jersey is in a temperate area, diel activity was investigated during the  
14 early season (3-19 July), peak season (25 July-19 September), and late season (22 September- 22  
15 October). *Aedes albopictus* showed the highest activity during peak and late seasons at solar  
16 noon ( $P < 0.05$ ). At sunrise and sunset during the peak season, *Ae. albopictus* activity was  
17 similar. Lunar midnight activity was significantly lower than sunrise and solar noon ( $P < 0.05$ )  
18 but was similar to that of sunset. In the late season, the highest activity was observed during solar  
19 noon while the least activity was observed during sunrise and lunar midnight ( $P < 0.05$ ). Rotator  
20 traps used in conjunction with the human sweep net technique exhibited similar results. Seasonal  
21 activity was not differentiated in Florida due to the consistent subtropical weather. The highest  
22 adult activity was observed at sunrise using human sweep netting but it was not significantly

23 different from solar noon and sunset. The lowest adult activity was observed at lunar midnight;  
24 however, it was not significantly different from solar noon and sunset. These results provide  
25 evidence that the diel activity of *Ae. albopictus*, contrary to the common perception of its diurnal  
26 activity, is much more varied. Because of the involvement of the species in the transmission of  
27 debilitating mosquito-borne pathogens such as chikungunya, dengue, and Zika virus, coupled  
28 with its affinity to thrive in human peridomestic environments, our findings have global  
29 implications in areas where *Ae. albopictus* thrives. It also highlights the importance of behavioral  
30 studies of vector species which will not only help mosquito control professionals plan the timing  
31 of their control efforts but also provide empirical evidence against conventional wisdoms that  
32 may unjustly persist within public health stewards.

33

34 **Keywords:** *Stegomyia*, behavior, bottle rotator trap, human sweep netting, field study

35

36

37

38

39

40

41

42

43 **Author Summary**

44 The Asian tiger mosquito, *Aedes albopictus*, is an invasive mosquito which is now established in  
45 at least 40 states in the USA. Lack of efficient surveillance and control methods against *Ae.*  
46 *albopictus*, in addition to human-aided accidental transportations, have played a great role in its  
47 rapid expansion. Although surveillance measures are becoming more systematic and effective,  
48 control of this species still poses a great challenge. *Aedes albopictus* is difficult to control in the  
49 larval stage because it primarily develops in artificial containers that are widespread in  
50 peridomestic habitats. These habitats are not only ubiquitous in these environments, they are also  
51 cryptic, inaccessible, and extremely difficult to control. Therefore, control of *Ae. albopictus* in  
52 these environments often relies on adult control measures which utilize insecticides dispersed  
53 through ultra-low volume equipment as a cold aerosol space spray. These adulticide applications  
54 are often conducted at night against endemic mosquito species which are primarily active  
55 between dawn and dusk. However, since *Ae. albopictus* has been traditionally classified as a day-  
56 biting mosquito, mosquito control specialists have had doubts about the efficacy of a nocturnal  
57 application against a diurnally active mosquito. These uncertainties about intervention efforts  
58 become even more important during public health outbreaks of mosquito-borne pathogens such  
59 as chikungunya, dengue, or Zika viruses when protection of public health is of paramount  
60 importance in peridomestic habitats. Our investigations provide evidence that *Ae. albopictus*  
61 exhibits activity throughout the day and night and that nighttime adulticide applications may  
62 indeed be effective against this species, and should not be disregarded.

63

64

## 65 INTRODUCTION

66 Most terrestrial organisms are exposed to daily changes in light, dark, and temperature cycles.

67 They have adapted to these changes and express specific behaviors which are genetically

68 controlled. *Aedes albopictus* (Skuse), the Asian tiger mosquito, is a competent vector of many

69 mosquito-borne viruses such as dengue (DENV) and chikungunya (CHIKV) [1,2]. It is also a

70 major pest species that can drive children indoors and detrimentally impact human quality of life

71 [3,4]. Understanding the diel activity of *Ae. albopictus*, specifically the times when it may be

72 host seeking, is essential because of its vectorial status as well as the need for effective control

73 measures.

74 The need for successful and sustainable *Ae. albopictus* control programs became more evident

75 due to the recent outbreak of arboviral diseases globally, particularly with the expansion of Zika

76 virus (ZIKV) [5]. Additionally, outbreaks of DENV in locations such as the Seychelles Islands,

77 China, La Réunion, Hawaii, Mauritius, and Europe have implicated *Ae. albopictus* as the primary

78 vector [6,7]. Autochthonous transmission of CHIKV implicating *Ae. albopictus* as the main

79 vector, has also been documented both in France [8] and Italy [9]. In Gabon, central Africa,

80 epidemiological surveillance has determined that *Ae. albopictus* was the principal vector of

81 ZIKV during an urban outbreak in 2007 [10]. The species has also drawn the attention of vector

82 control and public health professionals, particularly in expanding and newly invaded areas [11-

83 13].

84 When an invasive species becomes endemic in a new area, it may display different biological

85 behaviors, including host preference, diel activity, and vector competence [10,14-16], which all

86 pose new challenges for vector control specialists. The first detection of *Ae. albopictus* in the

87 continental United States in 1985 and its subsequent spread displayed that mosquito control  
88 districts were not equipped with effective methods to conduct surveillance and control for this  
89 peridomestic species. For example, the establishment of *Ae. albopictus* in New Jersey was first  
90 recorded in 1995 from a trap collection in Keyport, Monmouth County [17], however it wasn't  
91 until 2008 that all 21 mosquito control districts in New Jersey finally obtained an effective trap  
92 to conduct surveillance for this species [18,19]. Prior to this, the presence of *Ae. albopictus* was  
93 only detected using New Jersey light traps, which are poor devices in gauging the presence or  
94 abundance of this species [20]. In the late 2000's, after numerous field evaluations, the newly  
95 created Biogents Sentinel (BGS) (Biogents AG, Regensburg, Germany) traps were recognized as  
96 the standard surveillance tool for *Ae. albopictus* and *Aedes aegypti* L. [20-22]. Even though the  
97 BGS traps are generally operated over a 24-hour period, they do not provide information about  
98 the diel host seeking periods of invasive *Aedes* mosquitoes such as *Ae. aegypti* and *Ae.*  
99 *albopictus*. Elucidating the diel activity of these species is crucial to understanding their  
100 behavior, which helps vector control and public health professionals better focus their  
101 surveillance and control efforts to maintain quality of life and prevent disease outbreaks.

102 In Hawley's (1988) review of *Ae. albopictus* biology, field studies on diel activity patterns  
103 conducted in several countries in Asia reported peak blood feeding during daylight but rarely  
104 during the night hours [23]. Almeida et al. (2005) reported from the Chinese Territory of Macao,  
105 that *Ae. albopictus* displayed a bimodal biting peak activity during the morning and later  
106 afternoon [24]. Similar results were reported on La Reunión Island where bimodal blood feeding  
107 activity for *Ae. albopictus* females was higher in the morning and afternoon peaks [25]. Hassan  
108 (1996) found morning and evening twilight peaks for both sexes of *Ae. albopictus* in Malaysia

109 [26]. On the contrary in Japan, researchers determined active *Ae. albopictus* behavior through  
110 night time nectar feeding between 2100 and 2130 hours [27]. In addition, although researchers  
111 observed bimodal activity in Macao, they also detected some activity during all 24 hours of the  
112 day for *Ae. albopictus* [24]. However, the vast majority of previously published investigations all  
113 incriminate *Ae. albopictus* as primarily diurnal [24-26,28]. This has led to the acceptance of  
114 certain fallacies that have permeated vector control communities, particularly in the USA. For  
115 example, adult mosquito suppression methods generally utilize adulticides which are applied as  
116 ultra-low volume (ULV) cold aerosol sprays during the night. But because ULV applications  
117 have not been efficacious or long lasting in controlling diurnally active urban mosquitoes, they  
118 have been declared ineffective, particularly for reduction of disease transmission, as reviewed in  
119 [29]. One reason for failure of control has been attributed to the nocturnal resting behavior of  
120 day-biting mosquitoes in natural and artificial places that are sheltered from the insecticide  
121 plume. The ineffectiveness of nighttime ULV applications against diurnal mosquitoes has  
122 unfortunately become the conventional wisdom within the modern vector control community and  
123 many vector control programs simply do not attempt to adulticide against *Ae. albopictus* because  
124 they are under the assumption that this species may not be active at all during the nighttime ULV  
125 application periods.

126 However, during a variety of field investigations aimed at elucidating the biology, ecology, and  
127 effective control methods against *Ae. albopictus* in temperate central New Jersey [30-32], it has  
128 been observed that this species may also be active even during the nighttime hours [29,33]. As a  
129 result, the goal of this study was to investigate the diel activity of *Ae. albopictus* in New Jersey  
130 and Florida, in order to further elucidate the biology of this important vector mosquito. Our

131 primary objective was to provide empirical data to prove that invasive *Aedes* mosquitoes, such as  
132 *Ae. albopictus*, are indeed active throughout the 24 hr diel period and to challenge conventional  
133 wisdoms that night time applications of adulticides may indeed be effective during those periods  
134 because of the continuous activity of the target species around the clock.

135

## 136 **Materials and Methods**

### 137 **Site Selection**

138 All study sites in New Jersey were highly urbanized, residential sites within the City of Trenton  
139 and were comparable to the field site descriptions provided by Unlu et al. (2011) and Farajollahi  
140 et al. (2012). The study area encompassed a mix of two-story row homes or duplexes and  
141 occasionally, abandoned homes subject to occupation by transients. Study sites in Florida were  
142 selected in suburban neighborhoods in the City of Edgewater. Edgewater is located along the  
143 Indian River, adjacent to the Mosquito Lagoon.

### 144 **Human Sweep Net Collections**

145 Human sweep net collections were made using a standard 30.5 cm diameter sweep net purchased  
146 from Fisher Scientific (Atlanta, GA, USA). In both locations, the same individuals conducted  
147 human sweep netting for the duration of the experiment. With two collectors per residential  
148 properties, the collectors took turns walking around the perimeter of the parcel, as the geography  
149 allowed, and ending at the pre-determined sampling location which was a shaded or partially  
150 shaded area free of obstruction. At the sampling location, each collector stood still and moved  
151 the sweep net in a figure eight pattern (Fig. 1) for five minutes to collect mosquitoes. On each  
152 minute mark, the collector rotated 90° degrees, such that in the final minute the individual was in



153 the original (first minute) position. After completing the sampling process, the first collector  
154 returned to the vehicle to place the net in a cooler with dry ice and after 15 minutes, the second  
155 collector repeated the process with a second net. A single collector performed all sampling in  
156 Florida following the same experimental protocol used in New Jersey. All mosquito specimens  
157 collected were counted and identified to species. Weekly collections were made between 8  
158 August and 22 October in New Jersey and between 16 July and 9 September 2013 in Florida. For  
159 analysis of New Jersey data, the study was divided into two seasonal periods: 1) peak (8 - 29  
160 August), and 2) late (5 September - 3 October).

### 161 **Sampling Time – Diel Periods**

162 A 24 h day was divided into four discrete sampling periods: Sunrise, Solar Noon, Sunset, and  
163 Lunar Midnight. Solar Noon was identified using the National Oceanic & Atmospheric  
164 Administration solar calculator (<http://www.esrl.noaa.gov/gmd/grad/solcalc/>) and Lunar  
165 Midnight was defined as 12 h post Solar Noon. Sunrise and Sunset were delineated using  
166 Weather Underground's regional times for sunrise and sunset  
167 (<https://www.wunderground.com/>). Ten and six residential properties were chosen in New Jersey  
168 and Florida, respectively, which required that the human sweep netting be initiated 30 mins prior  
169 and ending no more than 30 mins post the determined sampling periods.

### 170 **Carbon Dioxide-baited Bottle Rotator Trap Collection**

171 In New Jersey the diel activity of *Ae. albopictus* was also measured using a collection bottle  
172 rotator (CBR) equipped with a CDC miniature light trap (model 1512 and 512 respectively, John  
173 W. Hock Company, Gainesville, FL, USA). The CBR consists of a programmable timer powered  
174 by a 12-volt, ten-amp rechargeable DC battery which allows for the collection of adult

175 mosquitoes at eight different times during a 24 h period. A voltage regulator (BioQuip Products  
176 Inc., Rancho Dominguez, CA, USA) was added to allow the use of the 6-volt CDC miniature trap  
177 on the 12-volt CBR system. A CBR with eight jars was used to segregate collections into eight  
178 time periods, each lasting three hours. The periods were defined as: 0700-1000, 1000-1300,  
179 1300-1600, 1600-1900, 1900-2200, 2200-0100, 0100-0400, and 0400-0700. Traps were re-  
180 programmed weekly to compensate for seasonal changes according to Solar Noon. The CBR  
181 traps were baited with CO<sub>2</sub> and BG Lures (Biogents AG, Regensburg, Germany). Traps were  
182 held in place using a cast-concrete base and positioned 0.5 m above ground level. Adult  
183 mosquito collections took place between 3 July and 22 October 2013. At the end of 24 h  
184 sampling period, traps and trap contents were transported to the laboratory, identified to species,  
185 and counted. Female and male *Ae. albopictus* were recorded separately. For data analysis, the  
186 study was divided into three seasonal periods: 1) early (3-19 July), 2), peak (25 July-19  
187 September), and 3) late (22 September- 22 October).

#### 188 **Comparison of Biogents Sentinel Trap Catches with Human Sweep Net Collection**

189 Biogents Sentinel traps were deployed in conjunction with human sweep net surveillance in  
190 order to investigate the correlation between the two. Biogents Sentinel traps were baited with a  
191 BG-Lure, and deployed for a 24 h sampling period. Traps were deployed in the same parcels  
192 where human sweep netting was performed. The traps were placed no closer than 7.5 m and no  
193 more than 10.5 m away from the location of the human sweep netting. At the end of 24 hours,  
194 traps and trap contents were transported to the respective laboratories in New Jersey and Florida,  
195 identified to species, and counted. Female and male *Ae. albopictus* were recorded separately.

196

197 *Data Analysis*

198 **Analysis of HSN Data**

199 To determine the peak activity for *Ae. albopictus*, we compared the number of adults, female and  
200 male, collected during four time periods using a generalized linear model [34]. Overdispersion  
201 was detected via the Poisson model (value/df = 1.986), and the model was refit using negative  
202 binomial distribution (PROC GENMOD, SAS version 9.3; SAS Institute 2011) with site, season,  
203 time and interaction term season\*time all used as predictors. The model was determined to fit the  
204 data adequately ( $\chi^2 = 76.62$ , df = 63,  $P = 0.116$ ) in New Jersey and the interaction term was  
205 significant ( $\chi^2 = 65.20$ , df = 3,  $P < 0.001$ ). The association between Florida human sweep netting  
206 counts and time were investigated using Poisson regression adjusted for overdispersion (PROC  
207 GENMOD, SAS version 9.3; SAS Institute 2011), with site and time as predictors. The model fit  
208 adequately ( $\chi^2 = 20.61$ , df = 15,  $P = 0.150$ ) and the main effect of time was significant ( $\chi^2 = 9.94$ ,  
209 df = 3,  $P = 0.020$ ). The  $P$  values between comparisons were adjusted using Holm's test, which  
210 adjusts the calculation of probability in line with the number of comparisons made to avoid type  
211 I errors (Holm 1979).

212 **Collection Bottle Rotator Trap Analysis**

213 In order to compare the peak activity for *Ae. albopictus* using both human sweep netting and  
214 CBR trapping, two consecutive time periods from the CBR trapping collections were combined  
215 as follows: Sunrise collection was comprised of 05:00-11:00 collections; 11:00-17:00 collections  
216 formed Solar Noon; Sunset was comprised of 17:00-23:00; and 23:00-05:00 collections formed  
217 Lunar Midnight. The analysis was performed using the generalized linear model (PROC  
218 GENMOD, SAS version 9.3; SAS Institute 2011). Overdispersion was detected in Poisson and

219 negative binomial models. Therefore, an ANOVA model was fit to the bottle rotator trap data.  
220 The association between season and time were investigated using ANOVA (PROC GLM, SAS  
221 version 9.3 for Windows). Since normality and equal variances assumptions were violated, the  
222 Box-Cox transformation [35] was used to achieve approximate normality and the eighth root  
223 transformation was used to normalize the data. The main effects of site, season and time were  
224 used as predictors of the transformed adult counts. The  $P$  values between comparisons were  
225 adjusted by using Tukey's tests.

## 226 **Comparison Between HSN and BGS Trap Collections**

227 Linear correlations (Pearson's correlation) were calculated between the numbers of *Ae.*  
228 *albopictus* collected for human sweep netting and BGS traps for each state. Each human sweep  
229 netting session for each trapping location was 10 min while BGS traps deployed for 24 hrs,  
230 therefore a linear correlation test was appropriate to investigate the concordance of the two  
231 sampling methods.

232

## 233 **RESULTS**

### 234 **Human Sweep Net**

235 A total of 808 *Ae. albopictus* adults were collected in New Jersey, with 374 (46.3%), specimens  
236 collected during Solar Noon followed by 172 (21.3%) at Sunrise, and 156 (19.3%) and 106  
237 (13.1%) during Sunset and Lunar Midnight, respectively. Of the total number captured, 508 were  
238 females (62.9%) along with 300 males (37.1%). The association between human sweep netting  
239 counts, season, and time were investigated with site, season, time, and season\*time as predictors.

240 The main effect of season\*time was significantly associated with the collections ( $\chi^2 = 65.20$ ,  $df =$   
241  $3$ ,  $P < 0.001$ ). All pairwise contrasts for season\*time were examined and the results are listed in  
242 Table 1. Human sweep netting collections showed the greatest activity during Solar Noon in  
243 New Jersey during the peak and late season. Substantial activity was also detected at Sunrise,  
244 Sunset, and Lunar Midnight during the peak season with no significant difference between  
245 Sunset and Lunar Midnight. The mean number of *Ae. albopictus* per collection declined in late  
246 season (Figure 2). The highest level of activity was at Solar Noon, followed by that of Sunset,  
247 and both were statistically different ( $P < 0.05$ ) from Sunrise and Lunar Midnight.

248 In Florida, a total of 202 *Ae. albopictus* specimens were sampled with 68 (33.7%) captured  
249 at Sunrise, followed by 55 (27.2%) at Solar Noon, 48 (23.8%) during Sunset and 31 (15.4%) at  
250 Lunar Midnight. Collections were weighted towards females with a ratio of 5:1. The main effect  
251 of time was significantly associated with the collections ( $\chi^2 = 9.94$ ,  $df=3$ ,  $P = 0.020$ ). All  
252 pairwise contrasts for time were examined and the results are listed in Table 2. The only  
253 statistically significant activity for *Ae. albopictus* adults were found during Solar Noon and  
254 Lunar Midnight (Figure 2).

### 255 **Collection Bottle Rotator Trap**

256 We tried several statistical models for analysis of the CBR trap data set. We found the best fit  
257 with ANOVA for CBR trap collections. The main effects of site ( $F(1,17) = 13.79$ ,  $p = 0.002$ ),  
258 season ( $F(2,17)=11.40$ ,  $p = 0.001$ ), and time ( $F(3,17) = 9.03$ ,  $p = 0.001$ ) were significant  
259 predictors of the transformed mosquito counts. The least squares means and corresponding  
260 confidence intervals along with the results of post-hoc Tukey's tests for season and time are

261 provided in the Tables 3 and 4. *Aedes albopictus* adult activity was highest during peak season  
262 followed by early and late season (Figure 2). For time periods, the highest activity was recorded  
263 during Solar Noon and it was significantly different than the other times investigated, excluding  
264 Sunset (Table 4). The second highest activity was recorded during Sunset and it was significantly  
265 different than Sunrise and Lunar Midnight.

### 266 **Comparison between HSN and BGS Trap Collections**

267 A total of 808 *Ae. albopictus* adults were collected in New Jersey during human sweep netting  
268 collections. The BGS traps collected a total of 1,061 adults, close to a 1:1 ratio (585 females and  
269 476 males). In Florida, a total of 202 *Ae. albopictus* were collected with human sweep netting  
270 and BGS traps captured a total of 349 adults with a 6:1 ratio (299 females and 50 males).  
271 Correlation analysis of mosquito collections showed that HSN and BGS trap collections were  
272 positively correlated in New Jersey ( $r = 0.477$ ,  $p < 0.001$ ) and in Florida ( $r = 0.401$ ,  $p < 0.001$ ).

273

### 274 **DISCUSSION**

275 In New Jersey, diurnal activity was clearly greatest at Solar Noon during the peak and late  
276 seasons, but did not differ significantly between the two seasons. Activity was different when  
277 comparing Sunrise and Sunset in both peak and late season. Interestingly, activity at Lunar  
278 Midnight during peak season was only different from that of Solar Noon. Sampling activity  
279 in Florida was initiated in mid-July, when *Ae. albopictus* populations are often high. Overall, *Ae.*  
280 *albopictus* activity levels were lower in the suburban Florida environment than those found in  
281 New Jersey's urban habitat. There were no statistically significant differences in diel activity  
282 between Sunrise, Solar Noon, or Sunset in Florida, and while *Ae. albopictus* activity was lowest

283 at Lunar Midnight, the level of activity at this time period was only different from that of activity  
284 at Sunrise.

285 Bimodal activity has been documented in a variety of *Aedes* species including *Ae. aegypti* in  
286 Trinidad [36], *Aedes polynesiensis* Marks [37] in Samoa, and *Aedes woodi* Edwards [38] in East  
287 Africa. The bimodal activity of *Ae. albopictus* reported by Hawley (1988) and others, including  
288 Delatte et al. (2010) on the island of La Réunion during an outbreak of CHIKV was not observed  
289 in either New Jersey or Florida [23,25]. Delatte et al. (2010), however, recorded continuous  
290 activity across 24h in a series of human-baited experiments [25]. This is also the case with the  
291 data generated by human sweep netting collections in New Jersey and Florida, USA. These  
292 findings corroborate the previous observations made in New Jersey [29,33] supporting earlier  
293 field operations of nocturnal host seeking activity, and research including that of Yee and Foster  
294 (1992), Higa et al. (2000), and Barnard et al. (2011), identifying nocturnal host-seeking by *Ae.*  
295 *albopictus* under both laboratory and field conditions [39-41] . Barnard et al. (2011) found that  
296 25% of all *Ae. albopictus* activity monitored by human landing rates took place at night [40]. For  
297 those organizations charged with the deployment of ULV space sprays, our research provides  
298 supporting evidence for the success of adulticiding directed at *Ae. albopictus* in Mercer between  
299 2009-2011 [29], where nighttime applications of a pyrethroid insecticide (DUET™ Clarke,  
300 Roselle, IL, USA) at mid-label rates, when sprayed and spaced one or two days apart, achieved  
301 over 80% reduction in *Ae. albopictus* populations in the same urban habitats in which our current  
302 studies took place.

303 This study demonstrated that, late season diel activity was reduced from that of the peak season  
304 in temperate New Jersey climate. Activity levels remained greatest at Solar Noon while activity

305 at Sunrise and Lunar Midnight were negligible. Seasonal influences upon the diel activity of *Ae.*  
306 *albopictus* have been identified on La Reunion, with diel activity at night being reduced, and  
307 during winter being entirely absent as a result of lower temperatures [25]. Decreasing  
308 temperatures in New Jersey are known to influence diel activity of *Aedes* species, and cause  
309 shifting levels of activity between the summer and fall seasons [42]. While a temporal shift in the  
310 activity of *Ae. albopictus* is not apparent in New Jersey, overall activity is curtailed while diel  
311 activity remained limited to warmer temperatures between Solar Noon and Sunset.

312 Differences in the diel periodicity of *Aedes* mosquitoes from urban and rural locations have also  
313 been reported previously [43], and it has been proposed that the increased lumens associated  
314 with street and residential lights promotes modifications or adaptations in behavior, including  
315 host-seeking. Kawada et al. (2005) performed cross sections of the compound eye of *Ae.*  
316 *albopictus* to determine ommatidial diameter and interommatidial angle, determinants of vision  
317 [44]. The eye parameter value (1.59) identified explains the lower level of light that initiated  
318 host-seeking in *Ae. albopictus* when compared to *Ae. aegypti* in a laboratory setting, and may  
319 explain why *Ae. albopictus* has a preference for brighter environments. In addition, Sippell and  
320 Brown (1953) reported the importance of movement to host location by diurnal species [23,45].  
321 For example, under laboratory conditions, similar sized moving targets attracted twice the  
322 number of diurnally active *Aedes* mosquitoes compared to stationary targets. Trap capture of *Ae.*  
323 *albopictus* in Japan was attributed to the movement of field personnel walking toward and  
324 attending traps [46]. While our research was not designed to determine the potential influence of  
325 artificial light (i.e. street lights) in the urban and suburban residences, these might have



326 influenced *Ae. albopictus* night time activity [43]. Similar to artificial light, use of human sweep  
327 netting for surveillance must have provided strong visual cues to host-seeking mosquitoes.  
328 Biogents Sentinel traps have proven to be an effective surveillance tool for monitoring host-  
329 seeking populations of *Ae. albopictus*, and are used routinely to estimate population levels and  
330 direct decisions on control activities for this species. It is common practice in Florida to use a  
331 landing rate in association with a homeowner's service request in order to determine if the  
332 request is generated by *Ae. albopictus* activity [47]. Biogents Sentinel traps have previously been  
333 determined to approximate human landing rate estimates [21,48]. The positive correlation of  
334 BGS traps with human sweep netting in both the urban and suburban environments evaluated  
335 during this study is invaluable, when considering landing rate surveillance and the influence of  
336 varied levels of attractiveness, and collection and enumerating skills when performed by  
337 different individuals [49]. In addition, the availability of a surveillance tool such as the BGS trap,  
338 removes any perceived ethical concerns or problems related to personnel performing landing  
339 rates during periods of disease activity [50].

340 The diel activity demonstrated by *Ae. albopictus* in both New Jersey and Florida increases the  
341 potential of mosquito-human contact and therefore places individuals at risk of health impacts  
342 related to arbovirus transmission. The ongoing global expansion of *Ae. albopictus* and dynamics  
343 of viral adaptation and vector evolution continues to place more humans at risk [6,13,51]. The  
344 introduction of exotic pathogens such CHIKV, DENV, and ZIKV are no longer merely  
345 conjectural, but are now considered as regular ongoing occurrences globally. Additionally,  
346 DENV is considered the second most important mosquito-borne pathogen, trailing only malaria,  
347 which primarily affects impoverished populations and can be considered as a neglected tropical

348 disease. Given the emergence and re-emergence of DENV in both developed and undeveloped  
349 regions, and the lack of resources available for effective and timely intervention efforts, our  
350 study elucidates additional biological behaviors and diel activity that may prove instrumental for  
351 focused control. Furthermore, understanding temporal activity and potential seasonal influences  
352 upon levels of activity are also vitally important to the deployment of successful control  
353 strategies [52-54]. For personnel actively engaged in organized mosquito surveillance and  
354 control programs, this research provides critical information that supports the potential to impact  
355 adult populations of a likely disease vector outside widely accepted parameters. These types of  
356 investigations will further elucidate the biology and behavior of important vector species, and  
357 ultimately lead to more rapid and efficacious intervention efforts against neglected tropical  
358 diseases. Our investigations definitively provide evidence that *Ae. albopictus* displays some level  
359 of activity throughout the entire day, and that adult mosquito control measures conducted at  
360 night should not be discounted as part of an effective integrated vector management program.

361

362

363

364

365

366

367

368

369

370  
371  
372  
373  
374  
375  
376  
377  
378  
379  
380  
381  
382  
383  
384  
385  
386  
387  
388  
389  
390  
391

## ACKNOWLEDGEMENTS

The authors thank Charles S. Apperson for his critical review of an earlier draft of this manuscript. We thank James Pulaski for creation of drawings and Garret W Dow for field assistance. This work was supported by the USDA National Institute of Food and Agriculture Hatch project accession number 1020755 through the New Jersey Agricultural Experiment Station, Hatch project NJ08530.

392  
393  
394  
395  
396  
397  
398  
399  
400  
401  
402  
403  
404  
405  
406  
407  
408  
409  
410  
411  
412  
413

## FIGURE LEGENDS

Fig. 1. Diagrammatic representation of individual performing human sweep net surveillance using a butterfly or “Figure 8” pattern.

Fig 2. A. Human sweep netting counts from Florida for all *Aedes albopictus* during four time periods; Sunrise, Solar Noon, Sunset, and Lunar Midnight (red bars), and human sweep netting counts from New Jersey for all *Aedes albopictus* over two seasons (peak and late) and four time periods: Sunrise, Solar Noon, Sunset, and Lunar Midnight. B. Count bottle rotator trap counts of all *Aedes albopictus* at two study sites over three seasons (early, peak, and late) and over a 24 hr period in New Jersey.

‡Values not sharing the same superscript are significantly different (Holm’s test,  $P < 0.05$ )

414 References

- 415 1. Gratz NG (2004) Critical review of the vector status of *Aedes albopictus*. *Med Vet Entomol*  
416 18: 215-227.
- 417 2. Sardelis MR, Turell MJ, O'Guinn ML, Andre RG, Roberts DR (2002) Vector competence of  
418 three North American strains of *Aedes albopictus* for West Nile virus. *J Am Mosq*  
419 *Control Assoc* 18: 284-289.
- 420 3. Halasa YA, Shepard DS, Fonseca DM, Farajollahi A, Healy S, et al. (2014) Quantifying the  
421 impact of mosquitoes on quality of life and enjoyment of yard and porch activities in  
422 New Jersey. *PLoS One* 9: e89221.
- 423 4. Carrieri M, Bellini R, Maccaferri S, Gallo L, Maini S, et al. (2008) Tolerance thresholds for  
424 *Aedes albopictus* and *Aedes caspius* in Italian urban areas. *J Am Mosq Control Assoc* 24:  
425 377-386.
- 426 5. Azar SR, Roundy CM, Rossi SL, Huang JH, Leal G, et al. (2017) Differential vector  
427 competency of *Aedes albopictus* populations from the Americas for Zika virus. *Am J*  
428 *Trop Med Hyg* 97: 330-339.
- 429 6. Lambrechts L, Scott TW, Gubler DJ (2010) Consequences of the expanding global  
430 distribution of *Aedes albopictus* for dengue virus transmission. *PLoS Negl Trop Dis* 4:  
431 e646.
- 432 7. Perera-Lecoin M, Luplertlop N, Surasombatpattana P, Liégeois F, Hamel R, et al. (2016)  
433 Dengue and Chikungunya coinfection—The emergence of an underestimated threat.  
434 *Current Topics in Chikungunya*: 67.
- 435 8. Gould E, Gallian P, De Lamballerie X, Charrel R (2010) First cases of autochthonous dengue  
436 fever and chikungunya fever in France: from bad dream to reality! *Clin Microbiol Infect*  
437 16: 1702-1704.
- 438 9. Rezza G, Nicoletti L, Angelini R, Romi R, Finarelli A, et al. (2007) Infection with  
439 chikungunya virus in Italy: an outbreak in a temperate region. *The Lancet* 370: 1840-  
440 1846.
- 441 10. Grard G, Caron M, Mombo IM, Nkoghe D, Ondo SM, et al. (2014) Zika virus in Gabon  
442 (Central Africa)—2007: a new threat from *Aedes albopictus*? *PLoS Negl Trop Dis* 8:  
443 e2681.
- 444 11. Unlu I, Farajollahi A (2012) Vectors without borders: imminent arrival, establishment, and  
445 public health implications of the Asian bush (*Aedes japonicus*) and Asian tiger (*Aedes*  
446 *albopictus*) mosquitoes in Turkey. *Haceteppe J Biol Chem* 40: 23-36.
- 447 12. Benedict MQ, Levine RS, Hawley WA, Lounibos LP (2007) Spread of the tiger: global risk  
448 of invasion by the mosquito *Aedes albopictus*. *Vector Borne Zoonotic Dis* 7: 76-85.
- 449 13. Rochlin I, Ninivaggi DV, Hutchinson ML, Farajollahi A (2013) Climate change and range  
450 expansion of the Asian tiger mosquito (*Aedes albopictus*) in Northeastern USA:  
451 implications for public health practitioners. *PLoS One* 8: e60874.
- 452 14. Weinstein P, Laird M, Browne GN (1997) Exotic and endemic mosquitoes in New Zealand  
453 as potential arbovirus vectors: Ministry of Health Wellington.
- 454 15. Huang Y-JS, Ayers VB, Lyons AC, Unlu I, Alto BW, et al. (2016) *Culex* species mosquitoes  
455 and Zika virus. *Vector Borne Zoonotic Dis* 16: 673-676.

- 456 16. Ayers VB, Huang Y-JS, Lyons AC, Park SL, Dunlop JI, et al. (2019) Infection and  
457 transmission of Cache Valley virus by *Aedes albopictus* and *Aedes aegypti* mosquitoes.  
458 Parasit Vectors 12: 384.
- 459 17. Crans W, Chomsky M, Guthrie D, Acquaviva A (1996) First record of *Aedes albopictus* from  
460 New Jersey. J Am Mosq Control Assoc 12: 307-309.
- 461 18. Unlu I, Farajollahi A (2014) A multiyear surveillance for *Aedes albopictus* with Biogents  
462 Sentinel trap counts for males and species composition of other mosquito species. J Am  
463 Mosq Control Assoc 30: 122-125.
- 464 19. Unlu I, Farajollahi A, Healy SP, Crepeau T, Bartlett-Healy K, et al. (2011) Area-wide  
465 management of *Aedes albopictus*: choice of study sites based on geospatial  
466 characteristics, socioeconomic factors and mosquito populations. Pest Manage Sci 67:  
467 965-974.
- 468 20. Farajollahi A, Kesavaraju B, Price DC, Williams GM, Healy SP, et al. (2009) Field efficacy  
469 of BG-Sentinel and industry-standard traps for *Aedes albopictus* (Diptera: Culicidae) and  
470 West Nile virus surveillance. J Med Entomol 46: 919-925.
- 471 21. Krockel U, Rose A, Eiras AE, Geier M (2006) New tools for surveillance of adult yellow  
472 fever mosquitoes: comparison of trap catches with human landing rates in an urban  
473 environment. J Am Mosq Control Assoc 22: 229-238.
- 474 22. Unlu I, Baker M (2018) Comparison of BG-Sentinel prototype, BG-Sentinel-1, and BG-  
475 Sentinel-2: Better results with modification of earlier design. J Am Mosq Control Assoc  
476 34: 237-239.
- 477 23. Hawley WA (1988) The biology of *Aedes albopictus*. J Am Mosq Control Assoc Suppl 1: 1-  
478 39.
- 479 24. Almeida APG, Baptista SS, Sousa CA, Novo MTL, Ramos HC, et al. (2005) Bioecology and  
480 vectorial capacity of *Aedes albopictus* (Diptera: Culicidae) in Macao, China, in relation to  
481 dengue virus transmission. J Med Entomol 42: 419-428.
- 482 25. Delatte H, Desvars A, Bouétard A, Bord S, Gimonneau G, et al. (2010) Blood-feeding  
483 behavior of *Aedes albopictus*, a vector of Chikungunya on La Réunion. Vector Borne  
484 Zoonotic Dis 10: 249-258.
- 485 26. Hassan A (1996) Patterns in *Aedes albopictus* (Skuse) population density, host-seeking, and  
486 oviposition behavior in Penang, Malaysia. J Vector Ecol 21: 17-21.
- 487 27. Oda T (1964) Observations on the mosquitoes visiting the flowers of spindle trees,  
488 *Euonymus japonica*. Endemic Diseases Bulletin of Nagasaki University 6: 242-246.
- 489 28. Chen CD, Lee HL, Lau KW, Abdullah AG, Tan SB, et al. (2014) Biting behavior of  
490 Malaysian mosquitoes, *Aedes albopictus* Skuse, *Armigeres kesseli* Ramalingam, *Culex*  
491 *quinquefasciatus* Say, and *Culex vishnui* Theobald obtained from urban residential areas  
492 in Kuala Lumpur. Asian Biomedicine 8: 315-321.
- 493 29. Farajollahi A, Healy SP, Unlu I, Gaugler R, Fonseca DM (2012) Effectiveness of ultra-low  
494 volume nighttime applications of an adulticide against diurnal *Aedes albopictus*, a critical  
495 vector of dengue and chikungunya viruses. PLoS One 7: e49181.
- 496 30. Fonseca DM, Unlu I, Crepeau T, Farajollahi A, Healy SP, et al. (2013) Area-wide  
497 management of *Aedes albopictus*. Part 2: Gauging the efficacy of traditional integrated  
498 pest control measures against urban container mosquitoes. Pest Manage Sci 69: 1351-  
499 1361.

- 500 31. Unlu I, Farajollahi A, Rochlin I, Crepeau TN, Strickman D, et al. (2014) Differences in  
501 male–female ratios of *Aedes albopictus* (Diptera: Culicidae) following ultra-low volume  
502 adulticide applications. *Acta Trop* 137: 201-205.
- 503 32. Faraji A, Egizi A, Fonseca DM, Unlu I, Crepeau T, et al. (2014) Comparative host feeding  
504 patterns of the Asian tiger mosquito, *Aedes albopictus*, in urban and suburban  
505 Northeastern USA and implications for disease transmission. *PLoS Negl Trop Dis* 8:  
506 e3037.
- 507 33. Unlu I, A. BM, Indelicato N, Derek D, Zishuo Z, et al. (2018) Nighttime applications of two  
508 formulations of pyrethroids are effective against *Aedes albopictus* *J Am Mosq Control*  
509 *Assoc* 34: 158-162.
- 510 34. Schall R (1991) Estimation in generalized linear models with random effects. *Biometrika* 78:  
511 719-727.
- 512 35. Osborne J (2010) Improving your data transformations: Applying the Box-Cox  
513 transformation. *Pract Assess Res Evaluation* 15: 12.
- 514 36. Chadee DD (1988) Landing periodicity of the mosquito *Aedes aegypti* in Trinidad in relation  
515 to the timing of insecticidal space-spraying. *Med Vet Entomol* 2: 189-192.
- 516 37. Samarawickrema W, Sone F, Cummings R (1987) Seasonal abundance, diel biting activity  
517 and parity of *Aedes polynesiensis* marks and *A. samoanus* (Grünberg)(Diptera: Culicidae)  
518 in Samoa. *Bull Entomol Res* 77: 191-200.
- 519 38. Trpis M, Gerberg E (1974) Diel periodicity in the biting activity of *Aedes woodi* in East  
520 Africa. *Mosq News* 34: 443-447.
- 521 39. Yee WL, Foster WA (1992) Diel sugar-feeding and host-seeking rhythms in mosquitoes  
522 (Diptera: Culicidae) under laboratory conditions. *J Med Entomol* 29: 784-791.
- 523 40. Barnard D, Knue G, Dickerson C, Bernier U, Kline D (2011) Relationship between mosquito  
524 (Diptera: Culicidae) landing rates on a human subject and numbers captured using CO<sub>2</sub>-  
525 baited light traps. *Bull Entomol Res* 101: 277-285.
- 526 41. Higa Y, Tsuda Y, Tuno N, Takagi M (2000) Tempo-spatial variation in feeding activity and  
527 density of *Aedes albopictus* (Diptera: Culicidae) at peridomestic habitat in Nagasaki,  
528 Japan. *Med Entomol Zool* 51: 205-209.
- 529 42. Crans W, Sprenger D (1996) The blood-feeding habits of *Aedes sollicitans* (Walker) in  
530 relation to Eastern Equine Encephalitis virus in coastal areas of New Jersey. III. Habitat  
531 preference, vertical distribution, and diel periodicity of host-seeking adults. *J Vector Ecol*  
532 21: 6-13.
- 533 43. Chadee DD, Martinez R (2000) Landing periodicity of *Aedes aegypti* with implications for  
534 dengue transmission in Trinidad, West Indies. *J Vector Ecol* 25: 158-163.
- 535 44. Kawada H, Takemura S-Y, Arikawa K, Takagi M (2005) Comparative study on nocturnal  
536 behavior of *Aedes aegypti* and *Aedes albopictus*. *J Med Entomol* 42: 312-318.
- 537 45. Sippell W, Brown A (1953) Studies of the responses of the female *Aedes* mosquito. Part V.  
538 The role of visual factors. *Bull Entomol Res* 43: 567-574.
- 539 46. Kusakabe Y, Ikeshoji T (1990) Comparative attractancy of physical and chemical stimuli to  
540 aedine mosquitoes. *Med Entomol Zool* 41: 219-225.
- 541 47. Lloyd AM, C.R. C, D.B C (2018) Florida White Paper. Florida Coordinating Council on  
542 Mosquito Control Florida Mosquito Control: The state of the mission as defined by  
543 mosquito controllers, regulators, and environmental managers.

- 544 48. Obenauer P, Kaufman P, Kline D, Allan S (2010) Detection of and monitoring for *Aedes*  
545 *albopictus* (Diptera: Culicidae) in suburban and sylvatic habitats in north central Florida  
546 using four sampling techniques. *Environ Entomol* 39: 1608-1616.
- 547 49. Silver JB (2007) Mosquito ecology: field sampling methods: springer science & business  
548 media.
- 549 50. Association AMC (2017 ) Best Practices for Integrated Mosquito Management: A Focused  
550 Update.  
551 [https://cdnymawscom/wwwmosquitoorg/resource/resmgr/docs/Resource\\_Center/Training](https://cdnymawscom/wwwmosquitoorg/resource/resmgr/docs/Resource_Center/Training_Certification/1221_amca_guidelines_final_pdf)  
552 [\\_Certification/1221\\_amca\\_guidelines\\_final\\_pdf](https://cdnymawscom/wwwmosquitoorg/resource/resmgr/docs/Resource_Center/Training_Certification/1221_amca_guidelines_final_pdf).
- 553 51. Egizi A, Fefferman NH, Fonseca DM (2015) Evidence that implicit assumptions of ‘no  
554 evolution’ of disease vectors in changing environments can be violated on a rapid  
555 timescale. *Philos Trans R Soc Lond B Biol Sci* 370: 20140136.
- 556 52. Suárez-Mutis MC, Fé NF, Alecrim W, Coura JR (2009) Night and crepuscular mosquitoes  
557 and risk of vector-borne diseases in areas of piassaba extraction in the middle Negro  
558 River basin, state of Amazonas, Brazil. *Mem Inst Oswaldo Cruz* 104: 11-17.
- 559 53. Godsey MS, Burkhalter K, Delorey M, Savage HM (2010) Seasonality and time of host-  
560 seeking activity of *Culex tarsalis* and floodwater *Aedes* in Northern Colorado, 2006–  
561 20071. *J Am Mosq Control Assoc* 26: 148-159.
- 562 54. Gray KM, Burkett-Cadena ND, Eubanks MD, Unnasch TR (2011) Crepuscular flight activity  
563 of *Culex erraticus* (Diptera: Culicidae). *J Med Entomol* 48: 167-172.

564  
565

566

567

568



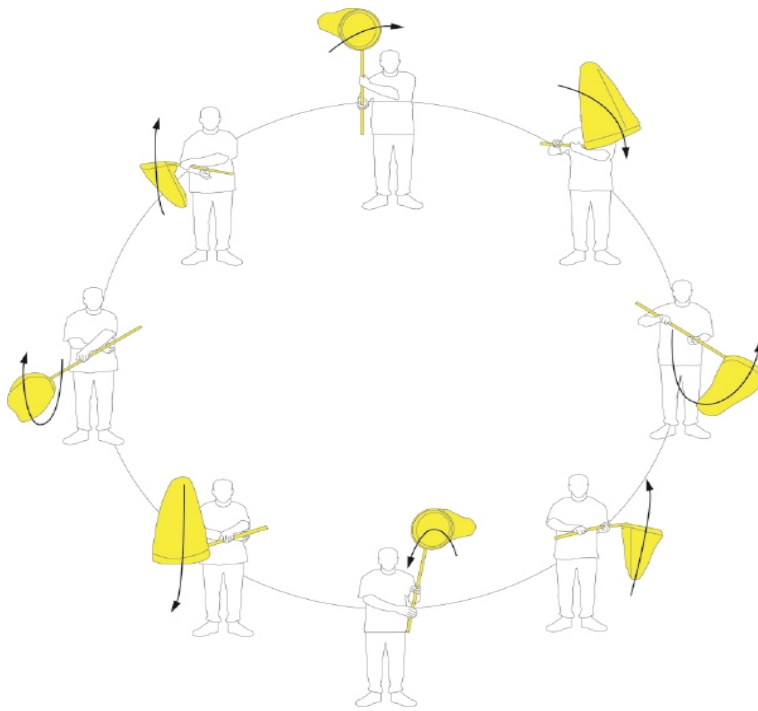

569

570 Figure 1.

571

572

573

574

575

576

577

578

579

580

581 Table 1. Least square means from log-linear analysis of New Jersey human sweep netting counts  
582 of all *Aedes albopictus* for ten study sites over two seasons (peak and late) and four time periods:  
583 Sunrise, Solar Noon, Sunset, and Lunar Midnight.

| Season | Time       | LS Mean <sup>¥</sup> | 95% C.I.      |
|--------|------------|----------------------|---------------|
| Peak   | Sunrise    | 13.48 <sup>b</sup>   | 10.60 - 17.15 |
|        | Solar Noon | 22.73 <sup>a</sup>   | 18.30 - 28.23 |
|        | Sunset     | 8.07 <sup>c</sup>    | 6.12 - 10.64  |
|        | Lunar Mid  | 8.77 <sup>c</sup>    | 6.70 - 11.5   |
| Late   | Sunrise    | 0.39 <sup>c</sup>    | 0.14 - 1.05   |
|        | Solar Noon | 10.22 <sup>a</sup>   | 7.89 - 13.25  |
|        | Sunset     | 3.62 <sup>b</sup>    | 2.51 - 5.23   |
|        | Lunar Mid  | 0.10 <sup>c</sup>    | 0.01 - 0.70   |

584

585 <sup>¥</sup>Values not sharing the same superscript are significantly different (Holm's test,  $P < 0.05$ )

586

587

588

589

590

591

592

593

594 Table 2. Least square mean estimates from log linear analysis of Florida human sweep net counts  
595 of all *Aedes albopictus* for six sites over four time periods: Sunrise, Solar Noon, Sunset, and  
596 Lunar Midnight.

| Time              | LS Mean <sup>¥</sup> | 95% C.I.    |
|-------------------|----------------------|-------------|
| Sunrise           | 4.39 <sup>a,b</sup>  | 2.82 - 6.85 |
| Solar Noon        | 5.43 <sup>a</sup>    | 3.56 - 8.29 |
| Sunset            | 3.83 <sup>a,b</sup>  | 2.42 - 6.07 |
| Lunar<br>Midnight | 2.47 <sup>b</sup>    | 1.47 - 4.17 |

597

598 <sup>¥</sup>Values not sharing the same superscript are significantly different (Holm's test,  $\alpha < 0.05$ )

599

600 Table 3. Least square means with confidence intervals for New Jersey bottle rotator trap  
601 counts of all *Aedes albopictus* at two study sites over three seasons (early, peak, and late) and  
602 over a 24 hr period.

| Season | LS Mean              | 95% C.I.        |
|--------|----------------------|-----------------|
| early  | 61.08 <sup>a,b</sup> | 22.68 - 146.98  |
| peak   | 247.92 <sup>a</sup>  | 109.26 - 522.93 |
| late   | 12.48 <sup>b</sup>   | 3.66 - 35.96    |

603 Values not sharing the same superscript are significantly different (Tukey's test,  $P < 0.05$ )

604

605

606

607

608

609

610

611

612

613

614

615

616

617

618

619

620 Table 4. Least square means with confidence intervals for New Jersey bottle rotator trap  
621 counts of all *Aedes albopictus* at two study sites over three seasons (early, peak and late)  
622 combined, during four different time periods.

| Time           | LS Means Estimate   | 95% C.I.       |
|----------------|---------------------|----------------|
| Sunrise        | 21.69 <sup>b</sup>  | 5.76 - 67.63   |
| Solar Noon     | 247.92 <sup>a</sup> | 95.24 - 582.20 |
| Sunset         | 175.64 <sup>a</sup> | 64.43 - 426.97 |
| Lunar Midnight | 10.65 <sup>b</sup>  | 2.47 - 36.66   |

623 Values not sharing the same superscript are significantly different (Tukey's test,  $P < 0.05$ )

624

625

626

627

628

629

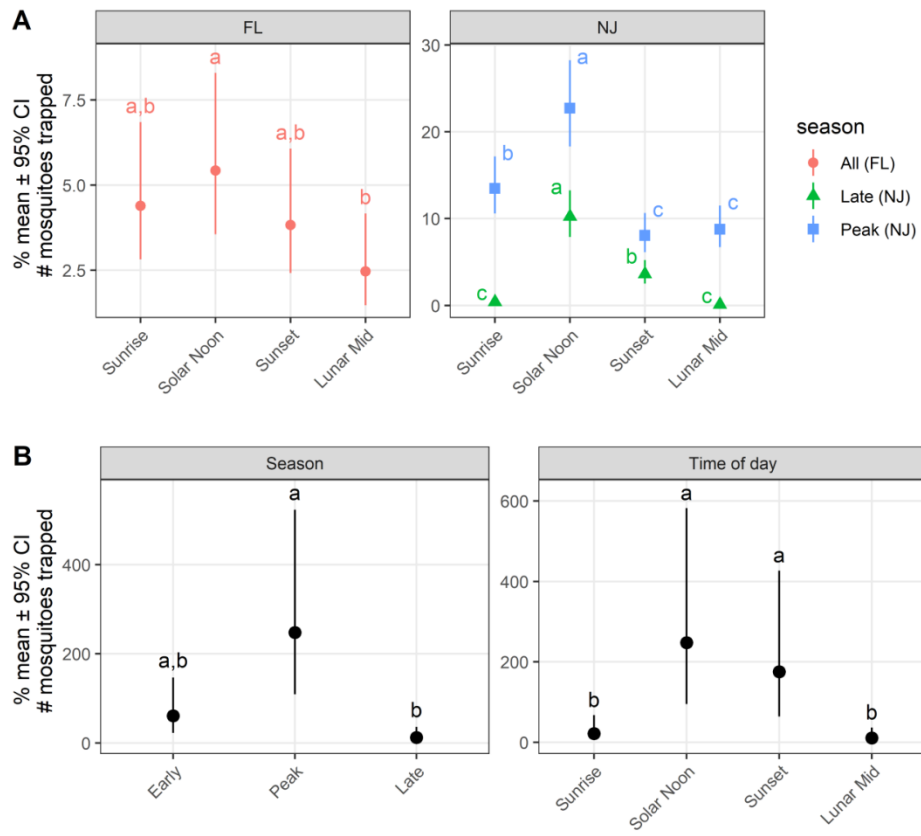

630 Figure 2.
